# Supplementary material
Source: HighWire-hosted journal article supplement (http://jmg.bmjjournals.com/highwire/filestream/187661/field_highwire_adjunct_files/0/jmg-2023-109223supp001_data_supplement.pdf)
Supplement: jmg-2023-109223supp001_data_supplement.pdf [file jmg-2023-109223supp001_data_supplement.pdf]

| Supplemental material. Description of the craniofacial features of the 31 POLR3-HDL subjects in this study's cohort |                     |                                               |               |                      |                                           |              |                         |              |               |                                           |                         |                                               |                 |                                          |                |                                           |               |                                                                                |
|---------------------------------------------------------------------------------------------------------------------|---------------------|-----------------------------------------------|---------------|----------------------|-------------------------------------------|--------------|-------------------------|--------------|---------------|-------------------------------------------|-------------------------|-----------------------------------------------|-----------------|------------------------------------------|----------------|-------------------------------------------|---------------|--------------------------------------------------------------------------------|
| Subject                                                                                                             | Gene                | High anterior hairline                        | High forehead | Bitemporal narrowing | Hypertelorism                             | Telecanthus  | Long palpebral fissures | Low-set ears | Flat midface  | Pinched nose                              | Bulbous tip of the nose | Short philtrum                                | Smooth philtrum | Thin upper lip                           | Full lower lip | Short chin                                | Pointed chin  | Other dysmorphic features (observed in <10%)                                   |
| 1                                                                                                                   | POLR3A              | +                                             |               |                      | +                                         | +            | +                       |              |               |                                           |                         | +                                             | +               |                                          |                |                                           | +             | Large mouth, bilateral syndactyly 2-3 toes                                     |
| 2                                                                                                                   | POLR3A              |                                               |               | +                    | +                                         |              | +                       |              | +             | +                                         |                         |                                               |                 | +                                        |                |                                           |               |                                                                                |
| 3                                                                                                                   | POLR3A              |                                               |               |                      |                                           |              |                         |              | +             | +                                         |                         | +                                             |                 |                                          |                |                                           |               | +                                                                              |
| 4                                                                                                                   | POLR3A              |                                               |               |                      | +                                         |              |                         | +            |               |                                           |                         |                                               |                 |                                          |                |                                           | +             | Chin dimple                                                                    |
| 5                                                                                                                   | POLR3A              |                                               |               |                      |                                           |              | +                       | +            | +             |                                           | +                       | +                                             |                 |                                          |                |                                           | +             |                                                                                |
| 6                                                                                                                   | POLR3A              | +                                             | +             |                      |                                           |              |                         |              | +             | +                                         | +                       |                                               |                 |                                          |                |                                           | +             | Sparing of lateral eyebrows                                                    |
| 7                                                                                                                   | POLR3A              | +                                             | +             |                      | +                                         |              |                         |              | +             |                                           |                         | +                                             |                 |                                          |                |                                           | +             | Upturned nose                                                                  |
| 8                                                                                                                   | POLR3A              |                                               |               |                      |                                           |              |                         |              | +             |                                           |                         |                                               | +               |                                          |                |                                           | +             |                                                                                |
| 9                                                                                                                   | POLR3A              | +                                             | +             |                      |                                           |              |                         |              | +             |                                           |                         |                                               | +               |                                          | +              |                                           |               | Deviating nasal root, retrognathia                                             |
| 10                                                                                                                  | POLR3A              |                                               |               | +                    | +                                         |              |                         |              |               |                                           |                         | +                                             |                 |                                          |                | +                                         |               | Short neck                                                                     |
| 11                                                                                                                  | POLR3A              | +                                             | +             |                      |                                           |              |                         |              |               | +                                         |                         | +                                             |                 |                                          |                |                                           | +             | Triangular face                                                                |
| 12                                                                                                                  | POLR3A              |                                               |               |                      |                                           |              |                         |              | +             |                                           | +                       |                                               | +               |                                          |                |                                           | +             |                                                                                |
| 13                                                                                                                  | POLR3A              | +                                             |               |                      |                                           |              |                         |              |               | +                                         |                         |                                               | +               |                                          |                |                                           | +             | Ptosis, bifid tip of the nose                                                  |
| 14                                                                                                                  | POLR3A              | +                                             | +             | +                    |                                           |              |                         |              | +             |                                           |                         | +                                             | +               |                                          |                |                                           |               | Ptosis, downslanting palpebral fissure, mildly overfolded helixes, prognathism |
| 15                                                                                                                  | POLR3A              |                                               |               |                      |                                           |              |                         |              | +             | +                                         |                         | +                                             |                 | +                                        | +              |                                           |               | Hypotelorism, broad nasal tip, low-hanging columella                           |
| 16                                                                                                                  | POLR3A              | +                                             | +             |                      | +                                         |              |                         |              |               |                                           |                         |                                               | +               |                                          | +              |                                           | +             | Spaced medial eyebrows, broad nasal bridge                                     |
| 17                                                                                                                  | POLR3B              | +                                             |               |                      |                                           |              | +                       |              | +             |                                           |                         | +                                             | +               | +                                        | +              | +                                         |               | Broad and flat nasal bridge                                                    |
| 18                                                                                                                  | POLR3B              |                                               |               |                      |                                           |              |                         |              |               | +                                         |                         |                                               | +               |                                          |                |                                           |               | Depressed nasal bridge, retrognathia                                           |
| 19                                                                                                                  | POLR3B              |                                               |               |                      |                                           |              |                         |              | +             | +                                         | +                       |                                               | +               | +                                        |                |                                           | +             |                                                                                |
| 20                                                                                                                  | POLR3B              |                                               |               |                      |                                           |              |                         | +            | +             | +                                         |                         |                                               |                 |                                          |                |                                           |               | Deviating nasal root                                                           |
| 21                                                                                                                  | POLR3B              | +                                             |               |                      |                                           | +            |                         |              |               |                                           |                         | +                                             | +               | +                                        | +              |                                           | +             | Large ears                                                                     |
| 22                                                                                                                  | POLR3B              |                                               |               |                      | +                                         |              | +                       |              | +             |                                           |                         |                                               | +               | +                                        | +              |                                           | +             | Short nose                                                                     |
| 23                                                                                                                  | POLR3B              | +                                             | +             |                      |                                           | +            |                         |              | +             |                                           |                         |                                               |                 |                                          | +              | +                                         |               | Inferior epicanthus                                                            |
| 24                                                                                                                  | POLR3B              | +                                             | +             |                      |                                           |              | +                       |              | +             |                                           |                         |                                               | +               | +                                        |                |                                           |               | Hockey-stick palmar creases                                                    |
| 25                                                                                                                  | POLR3B              | +                                             | +             |                      |                                           |              | +                       |              |               | +                                         |                         |                                               | +               | +                                        |                |                                           |               | Hockey-stick palmar creases                                                    |
| 26                                                                                                                  | POLR3B              |                                               | +             |                      | +                                         |              |                         | +            |               |                                           |                         | +                                             | +               |                                          |                |                                           | +             | Copped ears, low hanging columella                                             |
| 27                                                                                                                  | POLRIC              |                                               |               | +                    |                                           | +            |                         | +            | +             |                                           |                         |                                               | +               |                                          | +              |                                           | +             | Long eyelashes, long philtrum, inferior epicanthus                             |
| 28                                                                                                                  | POLRIC              |                                               |               | +                    | +                                         |              |                         |              |               |                                           |                         | +                                             |                 |                                          |                |                                           |               | Downslanted palpebral fissure, large mouth, short neck, abnormal external ears |
| 29                                                                                                                  | POLRIC              |                                               |               |                      |                                           |              |                         |              |               |                                           | +                       | +                                             |                 | +                                        |                |                                           | +             | Peri-orbital fullness, low-hanging columella                                   |
| 30                                                                                                                  | POLRIC              |                                               |               |                      |                                           |              |                         |              | +             | +                                         |                         |                                               | +               |                                          |                |                                           | +             | Broad nasal bridge, retrognathia                                               |
| 31                                                                                                                  | POLR3A (+/- POLR3B) | +                                             | +             |                      |                                           |              | +                       | +            | +             | +                                         | +                       | +                                             | +               | +                                        | +              | +                                         | +             | Epicanthal fold                                                                |
|                                                                                                                     |                     | 14/31 (45.2%)                                 | 11/31 (35.4%) | 5/31 (16.1%)         | 9/31 (29.0%)                              | 4/31 (12.9%) | 7/31 (22.6%)            | 6/31 (19.4%) | 19/31 (61.3%) | 11/31 (35.5%)                             | 6/31 (22.6%)            | 12/31 (38.7%)                                 | 18/31 (58.0%)   | 9/31 (29.0%)                             | 8/31 (25.8%)   | 6/31 (19.4%)                              | 16/31 (51.6%) |                                                                                |
|                                                                                                                     |                     | 15/31 with an anomaly of the forehead (48.4%) |               |                      | 16/31 with an anomaly of the eyes (51.6%) |              |                         |              |               | 15/31 with an anomaly of the nose (48.4%) |                         | 26/31 with an anomaly of the philtrum (83.9%) |                 | 13/31 with an anomaly of the lip (41.9%) |                | 22/31 with an anomaly of the chin (71.0%) |               |                                                                                |
